# Supplementary material
Source: publisher figshare collection journal article supplement (https://tandf.figshare.com/ndownloader/files/21983556)
Supplement: Supplementary file 1 [file 21983556]

**Supplementary Table 1.**Survey responses.

| Categories and questions (*N*=75) | *n* (%) of those responding |
| --- | --- |
| Birth control ideas: what I know and what I think |  |
| *I have heard of the IUD (intrauterine device) (a birth control method that goes in the uterus; names of IUDs include Mirena, Paragard, Skyla, Liletta and Kyleena)1 |  |
| Yes | 47 (64) |
| No | 14 (19) |
| Not sure | 13 (18) |
| *°Do you think that a woman can get an IUD put in right away (within minutes) after she delivers the baby? |  |
| Yes | 21 (28) |
| No | 21 (28) |
| Not sure | 33 (44) |
| *°Do you think that an IUD right after delivery is safe for mothers who want to breastfeed?3 |  |
| Yes | 25 (35) |
| No | 15 (21) |
| Not sure | 32 (44) |
| *°Do you think that it is safe for teenagers to get an IUD?1 |  |
| Yes | 26 (35) |
| No | 15 (21) |
| Not sure | 32 (43) |
| Communication |  |
| *Have any of your girlfriends or partners had an IUD?1 |  |
| Yes | 30 (40) |
| No | 29 (39) |
| Not sure | 15 (20) |
| *If yes, did they tell you it was good or bad?14 |  |
| Said it was fine | 13 (21) |
| Did not like it | 7 (11) |
| Liked it somewhat | 10 (16) |
| Did not tell me | 31 (51) |
| Has a doctor or nurse ever recommended an IUD to your partner?1 |  |
| Yes | 23 (31) |
| No | 26 (35) |
| Don't know | 25 (34) |
| †Do you and your partner(s) ever talk about birth control/condoms?1 |  |
| Yes | 42 (57) |
| Sometimes | 16 (22) |
| No | 16 (22) |
| †If you do talk about birth control/condoms, did you agree about the type of birth control/condoms to use?3 |  |
| Yes | 41 (57) |
| Sometimes | 16 (22) |
| No | 15 (21) |
| †Do you use birth control/condoms with your current partner?2 |  |
| Yes | 26 (36) |
| Sometimes | 15 (21) |
| No, not usually | 32 (44) |
| †If you do use birth control/condoms, who decided which type to use?10 |  |
| Me | 16 (25) |
| Partner | 13 (20) |
| Both of us | 36 (55) |
| Did your partner ever get pregnant because you or she would not agree to use birth control/condoms?2 |  |
| Yes | 22 (30) |
| Sometimes | 8 (11) |
| No | 42 (58) |
| ‡Do you and your partner(s) ever talk about parenting (how to care for your baby, child, or children?3 |  |
| Yes | 42 (58) |
| Sometimes | 12 (17) |
| No | 7 (10) |
| Do not have a baby | 11 (15) |
| ‡If you do discuss parenting, do you agree about parenting (feeding, sleep routines, discipline)?6 |  |
| Yes | 36 (52) |
| Sometimes | 17 (25) |
| No | 9 (13) |
| Do not have a baby | 7 (10) |
| Do you think it is hard or easy for your partner(s) to say no to sex if she doesn't want it or doesn't have birth control yet3 |  |
| Easy to say no | 31 (43) |
| Somewhere in the middle between easy and hard | 19 (26) |
| Hard to say no to me | 10 (14) |
| Not sure or haven't thought about it | 12 (17) |
| Has your partner ever wanted but not been able to get birth control/condoms?2 |  |
| Yes | 8 (11) |
| No | 45 (62) |
| I don’t know | 20 (27) |
| If yes, what got in the way?44 |  |
| Could not get to the clinic/hospital (transportation barrier) | 3 (10) |
| The doctor/nurse did not have the birth control my partner wanted | 3 (10) |
| The doctor/nurse could not put in/give/prescribe the birth control my partner wanted | 5 (16) |
| Insurance did not cover it or she could not pay it | 5 (16) |
| My partner did not feel comfortable asking for birth control/condoms | 6 (19) |
| Not sure if she was pregnant, so the doctor/nurse would not give birth control | 12 (39) |
| There was another barrier | 4 (13) |
| Personal views |  |
| *Do you have any worries about your partner having an IUD (anything you have heard about side effects)?2 |  |
| Yes | 20 (27) |
| No | 34 (47) |
| No opinion | 19 (26) |
| *If yes, can you circle any worries you have?31 |  |
| Pain with insertion | 9 (20) |
| Pain with sex for her or me | 15 (34) |
| Messes up her periods (monthly) | 19 (43) |
| Pain or cramping for her | 8 (18) |
| Worry about it coming out | 12 (27) |
| Worry about it getting lost in there | 12 (27) |
| Just don't like the idea of something in there | 5 (11) |
| Worry she won't get pregnant right away again after taking it out | 4 (9) |
| Worry about weight gain | 12 (27) |
| No worries | 6 (14) |
| Anything else | 5 (11) |
| The most important thing for me when choosing birth control is:13 |  |
| How well it works to prevent (stop) pregnancy | 6 (9) |
| How it feels during sex (if I or my partner would feel it) | 9 (14) |
| How convenient it is to buy or use | 5 (8) |
| How safe it is | 11 (17) |
| How long it lasts | 5 (8) |
| How often I have to use it | 3 (5) |
| What my partner thinks about it | 4 (6) |
| If it has to go on me or in her | 3 (5) |
| Side effects | 8 (12) |
| Family planning ideas |  |
| Do you plan to use birth control/condoms with the mother after your next baby is born?2 |  |
| Yes | 26 (36) |
| No | 16 (22) |
| Not sure | 14 (19) |
| No baby on the way so cannot answer this question | 17 (23) |
| †°How long do doctors/nurses say to wait to have sex after baby is born?4 |  |
| No wait needed/it is a personal decision | 2 (3) |
| 2 weeks | 7 (10) |
| 4–6 weeks | 51 (72) |
| Don't know | 11 (15) |
| †°How long do doctors/nurses say to wait to get pregnant again after you have had a baby?5 |  |
| Don't know of any recommendations | 18 (26) |
| It is a personal decision | 16 (23) |
| Wait 6 months to get pregnant again | 16 (23) |
| Wait 12 months to get pregnant again | 10 (14) |
| Wait 18 months to get pregnant again | 10 (14) |
| *Should a mother choose birth control depending on if she wants to breastfeed?3 |  |
| Yes, definitely or somewhat | 33 (46) |
| No, not really or not at all | 13 (18) |
| Have not thought about it | 26 (36) |
| Baby-feeding plans and ideas |  |
| ‡Have you had any children in the past who were breastfed?2 |  |
| Yes | 21 (29) |
| No | 43 (59) |
| Don't know or don't have any children yet | 9 (12) |
| ‡For any future children, do you hope they will be fed with:3 |  |
| Breast milk only | 22 (31) |
| Formula only | 16 (22) |
| Both breast milk and formula | 17 (24) |
| Unsure | 17 (24) |
| ‡°Have you heard what doctors/nurses say (recommend) about breastfeeding?3 |  |
| No I have not heard | 30 (42) |
| I am not sure except I know breastfeeding is good | 16 (22) |
| Yes, I heard that babies should have breast milk till 6 months and then formula is OK | 19 (26) |
| Yes, I heard that babies should have only breast milk till 6 months and then keep.on breastfeeding with added solid foods after that time | 7 (10) |
| ‡°Do you think any of these are reasons to want your baby to breastfeed7 |  |
| Good for baby's health | 48 (70.6) |
| Good for mother's health | 22 (32.4) |
| Helps with bonding | 28 (41.2) |
| Costs less than formula | 20 (29.4) |
| Not sure | 8 (11.8) |

Superscript following question is the number of participants not responding.

°Knowledge questions.

*Barriers related to use of the IUD.

†Barriers related to use of contraception in general.

‡Barriers related to intention of breastfeeding.

‘The most important thing for me when choosing birth control is’ indicates how often that response occurred in respondents' top three rankings of importance.
